# Supplementary material for: Comparisons of Corn Stover Silages after Fresh- or Ripe-Corn Harvested: Effects on Digestibility and Rumen Fermentation in Growing Beef Cattle
Source: MDPI journal article supplement (doi:10.3390/ani12101248), 2022-05-13
Supplement: s1 [file s1]

**Table S1.** The bacterial phyla and genera (> 1% abundance) as determined by 16S rRNA gene sequencing in the rumen content of beef cattle fed corn stover silage after fresh-corn harvested (CF) or corn stover silage after ripe-corn harvested (CR) diet (n = 7).

| Items <sup>1</sup>              | Diets |      | SEM   | p-value |
|---------------------------------|-------|------|-------|---------|
|                                 | CF    | CR   |       |         |
| p_Bacteroidetes                 | 56.7  | 58.1 | 1.15  | 0.06    |
| g_Prevotella_1                  | 14.5  | 15.8 | 1.13  | 0.48    |
| g_Rikenellaceae_RC9_gut_group   | 12.7  | 11.0 | 0.808 | 0.22    |
| g_Prevotellaceae_UCG-003        | 2.48  | 2.69 | 0.268 | 0.22    |
| g_Prevotellaceae_UCG-001        | 2.63  | 2.48 | 0.220 | 0.95    |
| p_Firmicutes                    | 35.3  | 32.8 | 1.15  | 0.06    |
| g_Succiniclacticum              | 4.75  | 4.71 | 0.396 | 0.65    |
| g_Ruminococcaceae_UCG-011       | 2.49  | 2.09 | 0.179 | 0.41    |
| g_Ruminococcaceae_NK4A214_group | 2.34  | 1.76 | 0.154 | 0.04    |
| g_Ruminococcaceae_UCG-014       | 1.93  | 1.91 | 0.140 | 0.75    |
| g_Saccharofermentans            | 1.93  | 1.71 | 0.106 | 0.34    |
| g_Ruminococcus_1                | 1.80  | 1.42 | 0.094 | 0.06    |
| g_Ruminococcaceae_UCG-010       | 1.46  | 1.45 | 0.057 | 0.85    |
| g_Christensenellaceae_R-7_group | 1.38  | 1.26 | 0.087 | 0.65    |
| g_Lachnospiraceae_AC2044_group  | 1.15  | 1.13 | 0.072 | 0.57    |
| p_Fibrobacteres                 | 1.60  | 1.67 | 0.128 | 0.65    |
| g_Fibrobacter                   | 1.57  | 1.64 | 0.128 | 0.65    |
| p_Patescibacteria               | 1.61  | 2.02 | 0.149 | 0.18    |
| g_Candidatus_Saccharimonas      | 1.27  | 1.64 | 0.141 | 0.22    |
| p_Proteobacteria                | 1.27  | 1.45 | 0.122 | 0.34    |
| p_Kiritimatiellaeota            | 0.92  | 1.14 | 0.082 | 0.14    |

<sup>1</sup>p = phylum, g = genus.
